# Supplementary material
Source: PubMed Central journal article supplement (PMC6050111)
Supplement: NIHMS970422-supplement-1.pdf [file NIHMS970422-supplement-1.pdf]

**Supplementary Table 1.** Clinicopathologic and surgical *characteristics of cRCC patients in our surgical cohort*

|                                                                    |                  |
|--------------------------------------------------------------------|------------------|
| <b>No. gender (%)</b>                                              |                  |
| Male                                                               | 78 (57)          |
| Female                                                             | 60 (43)          |
| <b>No. race (%)</b>                                                |                  |
| White                                                              | 132 (96)         |
| Black                                                              | 2 (1)            |
| Asian                                                              | 4 (3)            |
| <b>Median age at surgery, years (IQR)</b>                          |                  |
|                                                                    | 54.1 (45.5-63.9) |
| <b>No. surgical technique (%)</b>                                  |                  |
| Partial                                                            | 122 (88.4)       |
| Radical                                                            | 16 (11.6)        |
| Open                                                               | 113 (81.9)       |
| Laparoscopic                                                       | 10 (7.2)         |
| Robotic                                                            | 15 (10.9)        |
| <b>No. presenting symptom (%)</b>                                  |                  |
| Incidental, asymptomatic                                           | 122 (88.4)       |
| Local                                                              | 16 (11.6)        |
| <b>No. histologic subtype (%)</b>                                  |                  |
| Clear cell renal cell carcinoma                                    | 91 (65.9)        |
| Multilocular cystic renal cell neoplasm of low malignant potential | 18 (13)          |
| Benign multilocular cyst                                           | 16 (11.6)        |
| Papillary renal cell carcinoma                                     | 5 (3.6)          |
| Clear cell capillary renal cell carcinoma                          | 4 (2.9)          |
| Unclassified renal cell carcinoma                                  | 2 (1.4)          |
| Mixed epithelial and stromal tumor family                          | 2 (1.4)          |
| <b>No. Fuhrman grade (%)</b>                                       |                  |
| 1                                                                  | 22 (15.9)        |
| 2                                                                  | 85 (61.6)        |
| 3                                                                  | 9 (6.5)          |
| NA                                                                 | 22 (15.9)        |
| <b>No. pathologic stage (%)</b>                                    |                  |
| pT1a                                                               | 97 (70.3)        |
| pT1b                                                               | 15 (10.9)        |
| pT2a                                                               | 3 (2.2)          |

---

|             |         |
|-------------|---------|
| <b>pT3a</b> | 4 (2.9) |
| <b>pT3b</b> | 1 (0.7) |

---
