# Supplementary material
Source: PubMed Central journal article supplement (PMC6050111)
Supplement: NIHMS970422-supplement-2.pdf [file NIHMS970422-supplement-2.pdf]

**Supplementary Table 2.** Comparison of clinical, surgical and radiologic characteristics between pathologically confirmed renal cell carcinoma and benign tumor subtypes in our surgical cohort

|                                               | <b>Renal Cell Carcinoma<br/>n=102</b> | <b>Benign Tumors*<br/>n=36</b> | <b>P-value</b> |
|-----------------------------------------------|---------------------------------------|--------------------------------|----------------|
| <b>No. sex (%)</b>                            |                                       |                                |                |
| <b>Male</b>                                   | 65 (64)                               | 13 (36)                        | 0.006          |
| <b>Female</b>                                 | 37 (36)                               | 23 (64)                        |                |
| <b>No. race (%)</b>                           |                                       |                                |                |
| <b>White</b>                                  | 98 (96)                               | 34 (94)                        | 0.77           |
| <b>Black</b>                                  | 1 (1)                                 | 1 (3)                          |                |
| <b>Asian</b>                                  | 3 (3)                                 | 1 (3)                          |                |
| <b>No. presenting symptom (%)</b>             |                                       |                                |                |
| <b>Incidental, asymptomatic</b>               | 88 (86.3)                             | 34 (94.4)                      | 0.24           |
| <b>Local</b>                                  | 14 (13.7)                             | 2 (5.6)                        |                |
| <b>Median age at surgery (IQR)</b>            | 53.6 (44.9-63.7)                      | 55.6 (46.7-64.6)               | 0.50           |
| <b>No. surgical technique (%)</b>             |                                       |                                |                |
| <b>Partial</b>                                | 91 (89.2)                             | 31 (86.1)                      | 0.76           |
| <b>Radical</b>                                | 11 (10.8)                             | 5 (13.9)                       |                |
| <b>Open</b>                                   | 84 (82.4)                             | 29 (80.6)                      | 0.93           |
| <b>Laparoscopic</b>                           | 7 (6.9)                               | 3 (8.3)                        |                |
| <b>Robotic</b>                                | 11 (10.8)                             | 4 (11.1)                       |                |
| <b>Median radiologic tumor size, cm (IQR)</b> | 3.3 (2.3-4.7)                         | 2.9 (2.0-4.9)                  | 0.39           |
| <b>No. solid component (%)</b>                |                                       |                                |                |
| <b>Yes</b>                                    | 58 (56.9)                             | 11 (30.6)                      | 0.01           |
| <b>No</b>                                     | 44 (43.1)                             | 25 (69.4)                      |                |
| <b>No. solid component (%)</b>                |                                       |                                |                |
| <b>25-50%</b>                                 | 18 (17.6)                             | 5 (13.9)                       | 0.01           |
| <b>&lt;25%</b>                                | 40 (39.2)                             | 6 (16.7)                       |                |
| <b>No measurable solid component</b>          | 44 (43.1)                             | 25 (69.4)                      |                |
| <b>Median solid component size, cm (IQR)</b>  | 0.8 (0.6-1.2)                         | 0.6 (0.5-0.9)                  | 0.004          |
| <b>No. Bosniak Classification (%)</b>         |                                       |                                |                |
| <b>4</b>                                      | 49 (48)                               | 10 (27.8)                      | <0.0001        |
| <b>3</b>                                      | 52 (51)                               | 18 (50)                        |                |

|                                           |           |           |      |
|-------------------------------------------|-----------|-----------|------|
| <b>2F</b>                                 | 1 (1)     | 8 (22.2)  |      |
| <b>No. tumor location (%)</b>             |           |           |      |
| >50% Exophytic                            | 80 (78.4) | 26 (72.2) | 0.44 |
| <50% Exophytic                            | 7 (6.9)   | 5 (13.9)  |      |
| Endophytic                                | 15 (14.7) | 5 (13.9)  |      |
| <b>No. presence of calcifications (%)</b> |           |           |      |
| Yes                                       | 17 (16.7) | 13 (36.1) | 0.02 |
| No                                        | 85 (83.3) | 23 (63.9) |      |
| <b>No. presence of septations (%)</b>     |           |           |      |
| Yes                                       | 92 (90.2) | 31 (86.1) | 0.54 |
| No                                        | 10 (9.8)  | 5 (13.9)  |      |
| <b>No. presence of other cysts (%)</b>    |           |           |      |
| Yes                                       | 57 (55.9) | 19 (52.8) | 0.85 |
| No                                        | 45 (44.1) | 17 (47.2) |      |

\* Benign tumor subtypes include multilocular cystic renal cell neoplasm of low malignant potential, mixed epithelial and stromal tumor family, and benign multilocular cysts
